# Supplementary material for: Quail eggs in artificial nests change their coloration when exposed to ambient conditions: implication for studies on nest predation
Source: PeerJ. 2021 Jul 6;9:e11725. doi: 10.7717/peerj.11725 (PMC8269738; doi:10.7717/peerj.11725)
Supplement: Supplemental Information 2 [file peerj-09-11725-s002.xlsx]

## Sheet: Experiment 1_Egg reflectance
Egg	Spectrum	Treatment	Day	Egg Reflectance
1	UV	Direct sun light	Day 0	0.0984267
1	UV	Direct sun light	Day 3	0.158613
1	UV	Direct sun light	Day 7	0.18341
2	UV	Direct sun light	Day 0	0.0817667
2	UV	Direct sun light	Day 3	0.106523
2	UV	Direct sun light	Day 7	0.157093
3	UV	Direct sun light	Day 0	0.121827
3	UV	Direct sun light	Day 3	0.144693
3	UV	Direct sun light	Day 7	0.185707
4	UV	Direct sun light	Day 0	0.0889967
4	UV	Direct sun light	Day 3	0.127343
4	UV	Direct sun light	Day 7	0.179933
5	UV	Direct sun light	Day 0	0.136357
5	UV	Direct sun light	Day 3	0.214763
5	UV	Direct sun light	Day 7	0.26787
6	UV	Direct sun light	Day 0	0.148057
6	UV	Direct sun light	Day 3	0.193237
6	UV	Direct sun light	Day 7	0.231607
7	UV	Direct sun light	Day 0	0.139377
7	UV	Direct sun light	Day 3	0.181733
7	UV	Direct sun light	Day 7	0.193097
8	UV	Direct sun light	Day 0	0.15653
8	UV	Direct sun light	Day 3	0.25246
8	UV	Direct sun light	Day 7	0.286943
9	UV	Direct sun light	Day 0	0.14557
9	UV	Direct sun light	Day 3	0.18736
9	UV	Direct sun light	Day 7	0.223767
10	UV	Direct sun light	Day 0	0.123393
10	UV	Direct sun light	Day 3	0.174927
10	UV	Direct sun light	Day 7	0.216953
11	UV	1 white layer	Day 0	0.0850167
11	UV	1 white layer	Day 3	0.0955233
11	UV	1 white layer	Day 7	0.102247
12	UV	1 white layer	Day 0	0.0945067
12	UV	1 white layer	Day 3	0.0991667
12	UV	1 white layer	Day 7	0.09965
13	UV	1 white layer	Day 0	0.130713
13	UV	1 white layer	Day 3	0.153117
13	UV	1 white layer	Day 7	0.164293
14	UV	1 white layer	Day 0	0.109597
14	UV	1 white layer	Day 3	0.129683
14	UV	1 white layer	Day 7	0.14768
15	UV	1 white layer	Day 0	0.137623
15	UV	1 white layer	Day 3	0.16174
15	UV	1 white layer	Day 7	0.175193
16	UV	1 white layer	Day 0	0.14795
16	UV	1 white layer	Day 3	0.1758
16	UV	1 white layer	Day 7	0.178147
17	UV	1 white layer	Day 0	0.129717
17	UV	1 white layer	Day 3	0.154507
17	UV	1 white layer	Day 7	0.168007
18	UV	1 white layer	Day 0	0.19408
18	UV	1 white layer	Day 3	0.232107
18	UV	1 white layer	Day 7	0.253313
19	UV	1 white layer	Day 0	0.166857
19	UV	1 white layer	Day 3	0.192543
19	UV	1 white layer	Day 7	0.223623
20	UV	1 white layer	Day 0	0.142923
20	UV	1 white layer	Day 3	0.169537
20	UV	1 white layer	Day 7	0.16909
21	UV	2 white layer	Day 0	0.134507
21	UV	2 white layer	Day 3	0.15235
21	UV	2 white layer	Day 7	0.140897
22	UV	2 white layer	Day 0	0.154017
22	UV	2 white layer	Day 3	0.175387
22	UV	2 white layer	Day 7	0.171927
23	UV	2 white layer	Day 0	0.09426
23	UV	2 white layer	Day 3	0.103427
23	UV	2 white layer	Day 7	0.103833
24	UV	2 white layer	Day 0	0.165647
24	UV	2 white layer	Day 3	0.18586
24	UV	2 white layer	Day 7	0.169013
25	UV	2 white layer	Day 0	0.0803667
25	UV	2 white layer	Day 3	0.100107
25	UV	2 white layer	Day 7	0.102017
26	UV	2 white layer	Day 0	0.122973
26	UV	2 white layer	Day 3	0.13405
26	UV	2 white layer	Day 7	0.13438
27	UV	2 white layer	Day 0	0.0867133
27	UV	2 white layer	Day 3	0.10283
27	UV	2 white layer	Day 7	0.102583
28	UV	2 white layer	Day 0	0.134027
28	UV	2 white layer	Day 3	0.163743
28	UV	2 white layer	Day 7	0.16781
29	UV	2 white layer	Day 0	0.1592
29	UV	2 white layer	Day 3	0.182293
29	UV	2 white layer	Day 7	0.18211
30	UV	2 white layer	Day 0	0.124993
30	UV	2 white layer	Day 3	0.15466
30	UV	2 white layer	Day 7	0.152417
31	UV	4 white layer	Day 0	0.119293
31	UV	4 white layer	Day 3	0.17146
31	UV	4 white layer	Day 7	0.127623
32	UV	4 white layer	Day 0	0.145623
32	UV	4 white layer	Day 3	0.120683
32	UV	4 white layer	Day 7	0.157853
33	UV	4 white layer	Day 0	0.144447
33	UV	4 white layer	Day 3	0.142863
33	UV	4 white layer	Day 7	0.151967
34	UV	4 white layer	Day 0	0.171273
34	UV	4 white layer	Day 3	0.172617
34	UV	4 white layer	Day 7	0.18385
35	UV	4 white layer	Day 0	0.164983
35	UV	4 white layer	Day 3	0.166243
35	UV	4 white layer	Day 7	0.177577
36	UV	4 white layer	Day 0	0.121963
36	UV	4 white layer	Day 3	0.124603
36	UV	4 white layer	Day 7	0.135513
37	UV	4 white layer	Day 0	0.154427
37	UV	4 white layer	Day 3	0.144697
37	UV	4 white layer	Day 7	0.15684
38	UV	4 white layer	Day 0	0.168747
38	UV	4 white layer	Day 3	0.1787
38	UV	4 white layer	Day 7	0.179307
39	UV	4 white layer	Day 0	0.18336
39	UV	4 white layer	Day 3	0.16326
39	UV	4 white layer	Day 7	0.192043
40	UV	4 white layer	Day 0	0.14502
40	UV	4 white layer	Day 3	0.15286
40	UV	4 white layer	Day 7	0.168733
41	UV	1 black layer	Day 0	0.108557
41	UV	1 black layer	Day 3	0.108247
41	UV	1 black layer	Day 7	0.116937
42	UV	1 black layer	Day 0	0.15634
42	UV	1 black layer	Day 3	0.15879
42	UV	1 black layer	Day 7	0.170873
43	UV	1 black layer	Day 0	0.11292
43	UV	1 black layer	Day 3	0.10288
43	UV	1 black layer	Day 7	0.114767
44	UV	1 black layer	Day 0	0.13469
44	UV	1 black layer	Day 3	0.121463
44	UV	1 black layer	Day 7	0.127297
45	UV	1 black layer	Day 0	0.15528
45	UV	1 black layer	Day 3	0.143363
45	UV	1 black layer	Day 7	0.15147
46	UV	1 black layer	Day 0	0.0982833
46	UV	1 black layer	Day 3	0.08563
46	UV	1 black layer	Day 7	0.08932
47	UV	1 black layer	Day 0	0.14174
47	UV	1 black layer	Day 3	0.132813
47	UV	1 black layer	Day 7	0.144703
48	UV	1 black layer	Day 0	0.09526
48	UV	1 black layer	Day 3	0.0893467
48	UV	1 black layer	Day 7	0.0960267
49	UV	1 black layer	Day 0	0.111033
49	UV	1 black layer	Day 3	0.106217
49	UV	1 black layer	Day 7	0.111417
50	UV	1 black layer	Day 0	0.11618
50	UV	1 black layer	Day 3	0.104453
50	UV	1 black layer	Day 7	0.109247
1	VIS	Direct sun light	Day 0	0.177377
1	VIS	Direct sun light	Day 3	0.27091
1	VIS	Direct sun light	Day 7	0.343817
2	VIS	Direct sun light	Day 0	0.127523
2	VIS	Direct sun light	Day 3	0.189527
2	VIS	Direct sun light	Day 7	0.277957
3	VIS	Direct sun light	Day 0	0.15453
3	VIS	Direct sun light	Day 3	0.23512
3	VIS	Direct sun light	Day 7	0.319557
4	VIS	Direct sun light	Day 0	0.13199
4	VIS	Direct sun light	Day 3	0.205943
4	VIS	Direct sun light	Day 7	0.310087
5	VIS	Direct sun light	Day 0	0.204027
5	VIS	Direct sun light	Day 3	0.335687
5	VIS	Direct sun light	Day 7	0.429587
6	VIS	Direct sun light	Day 0	0.185257
6	VIS	Direct sun light	Day 3	0.28691
6	VIS	Direct sun light	Day 7	0.370923
7	VIS	Direct sun light	Day 0	0.208983
7	VIS	Direct sun light	Day 3	0.309367
7	VIS	Direct sun light	Day 7	0.372563
8	VIS	Direct sun light	Day 0	0.22878
8	VIS	Direct sun light	Day 3	0.370623
8	VIS	Direct sun light	Day 7	0.454433
9	VIS	Direct sun light	Day 0	0.16735
9	VIS	Direct sun light	Day 3	0.260903
9	VIS	Direct sun light	Day 7	0.367023
10	VIS	Direct sun light	Day 0	0.16403
10	VIS	Direct sun light	Day 3	0.26756
10	VIS	Direct sun light	Day 7	0.359893
11	VIS	1 white layer	Day 0	0.131987
11	VIS	1 white layer	Day 3	0.170997
11	VIS	1 white layer	Day 7	0.207227
12	VIS	1 white layer	Day 0	0.11897
12	VIS	1 white layer	Day 3	0.144637
12	VIS	1 white layer	Day 7	0.17179
13	VIS	1 white layer	Day 0	0.215667
13	VIS	1 white layer	Day 3	0.261107
13	VIS	1 white layer	Day 7	0.293477
14	VIS	1 white layer	Day 0	0.159037
14	VIS	1 white layer	Day 3	0.204697
14	VIS	1 white layer	Day 7	0.242633
15	VIS	1 white layer	Day 0	0.19438
15	VIS	1 white layer	Day 3	0.257013
15	VIS	1 white layer	Day 7	0.29765
16	VIS	1 white layer	Day 0	0.192843
16	VIS	1 white layer	Day 3	0.253967
16	VIS	1 white layer	Day 7	0.275737
17	VIS	1 white layer	Day 0	0.190713
17	VIS	1 white layer	Day 3	0.240393
17	VIS	1 white layer	Day 7	0.283997
18	VIS	1 white layer	Day 0	0.221347
18	VIS	1 white layer	Day 3	0.29549
18	VIS	1 white layer	Day 7	0.34023
19	VIS	1 white layer	Day 0	0.221177
19	VIS	1 white layer	Day 3	0.285243
19	VIS	1 white layer	Day 7	0.33733
20	VIS	1 white layer	Day 0	0.158387
20	VIS	1 white layer	Day 3	0.213993
20	VIS	1 white layer	Day 7	0.232193
21	VIS	2 white layer	Day 0	0.157003
21	VIS	2 white layer	Day 3	0.210893
21	VIS	2 white layer	Day 7	0.22444
22	VIS	2 white layer	Day 0	0.201863
22	VIS	2 white layer	Day 3	0.258857
22	VIS	2 white layer	Day 7	0.27153
23	VIS	2 white layer	Day 0	0.143093
23	VIS	2 white layer	Day 3	0.192203
23	VIS	2 white layer	Day 7	0.213773
24	VIS	2 white layer	Day 0	0.196737
24	VIS	2 white layer	Day 3	0.26308
24	VIS	2 white layer	Day 7	0.275257
25	VIS	2 white layer	Day 0	0.128
25	VIS	2 white layer	Day 3	0.17712
25	VIS	2 white layer	Day 7	0.201013
26	VIS	2 white layer	Day 0	0.138177
26	VIS	2 white layer	Day 3	0.199673
26	VIS	2 white layer	Day 7	0.21958
27	VIS	2 white layer	Day 0	0.119243
27	VIS	2 white layer	Day 3	0.17545
27	VIS	2 white layer	Day 7	0.192037
28	VIS	2 white layer	Day 0	0.16741
28	VIS	2 white layer	Day 3	0.23678
28	VIS	2 white layer	Day 7	0.265567
29	VIS	2 white layer	Day 0	0.161607
29	VIS	2 white layer	Day 3	0.24746
29	VIS	2 white layer	Day 7	0.269217
30	VIS	2 white layer	Day 0	0.14698
30	VIS	2 white layer	Day 3	0.228287
30	VIS	2 white layer	Day 7	0.25105
31	VIS	4 white layer	Day 0	0.162277
31	VIS	4 white layer	Day 3	0.208713
31	VIS	4 white layer	Day 7	0.224617
32	VIS	4 white layer	Day 0	0.196577
32	VIS	4 white layer	Day 3	0.247743
32	VIS	4 white layer	Day 7	0.264413
33	VIS	4 white layer	Day 0	0.19766
33	VIS	4 white layer	Day 3	0.242953
33	VIS	4 white layer	Day 7	0.2525
34	VIS	4 white layer	Day 0	0.195817
34	VIS	4 white layer	Day 3	0.251067
34	VIS	4 white layer	Day 7	0.260323
35	VIS	4 white layer	Day 0	0.206403
35	VIS	4 white layer	Day 3	0.263257
35	VIS	4 white layer	Day 7	0.273693
36	VIS	4 white layer	Day 0	0.161833
36	VIS	4 white layer	Day 3	0.219937
36	VIS	4 white layer	Day 7	0.230553
37	VIS	4 white layer	Day 0	0.20616
37	VIS	4 white layer	Day 3	0.269443
37	VIS	4 white layer	Day 7	0.266757
38	VIS	4 white layer	Day 0	0.159943
38	VIS	4 white layer	Day 3	0.224727
38	VIS	4 white layer	Day 7	0.232487
39	VIS	4 white layer	Day 0	0.182083
39	VIS	4 white layer	Day 3	0.259027
39	VIS	4 white layer	Day 7	0.269373
40	VIS	4 white layer	Day 0	0.15722
40	VIS	4 white layer	Day 3	0.226837
40	VIS	4 white layer	Day 7	0.228313
41	VIS	1 black layer	Day 0	0.190447
41	VIS	1 black layer	Day 3	0.219437
41	VIS	1 black layer	Day 7	0.224763
42	VIS	1 black layer	Day 0	0.244487
42	VIS	1 black layer	Day 3	0.277983
42	VIS	1 black layer	Day 7	0.26931
43	VIS	1 black layer	Day 0	0.172023
43	VIS	1 black layer	Day 3	0.200177
43	VIS	1 black layer	Day 7	0.20433
44	VIS	1 black layer	Day 0	0.185073
44	VIS	1 black layer	Day 3	0.22058
44	VIS	1 black layer	Day 7	0.21725
45	VIS	1 black layer	Day 0	0.199667
45	VIS	1 black layer	Day 3	0.238983
45	VIS	1 black layer	Day 7	0.240077
46	VIS	1 black layer	Day 0	0.12924
46	VIS	1 black layer	Day 3	0.153
46	VIS	1 black layer	Day 7	0.144027
47	VIS	1 black layer	Day 0	0.216677
47	VIS	1 black layer	Day 3	0.25988
47	VIS	1 black layer	Day 7	0.25882
48	VIS	1 black layer	Day 0	0.118187
48	VIS	1 black layer	Day 3	0.151587
48	VIS	1 black layer	Day 7	0.15992
49	VIS	1 black layer	Day 0	0.150503
49	VIS	1 black layer	Day 3	0.19398
49	VIS	1 black layer	Day 7	0.194187
50	VIS	1 black layer	Day 0	0.1458
50	VIS	1 black layer	Day 3	0.188577
50	VIS	1 black layer	Day 7	0.194387

## Sheet: Experiment 2_Egg reflectance
Nest	Spectrum	Day	Egg reflectance
1	UV	Day 0	0.049
1	UV	Day 14	0.113667
1	UV	Day 7	0.108333
2	UV	Day 0	0.068
2	UV	Day 14	0.160667
2	UV	Day 7	0.138333
3	UV	Day 0	0.0613333
3	UV	Day 14	0.135333
3	UV	Day 7	0.129
4	UV	Day 0	0.0646667
4	UV	Day 14	0.156333
4	UV	Day 7	0.155667
5	UV	Day 0	0.125667
5	UV	Day 14	0.281333
5	UV	Day 7	0.227333
6	UV	Day 0	0.118
6	UV	Day 14	0.180667
6	UV	Day 7	0.201667
7	UV	Day 0	0.0933333
7	UV	Day 14	0.171
7	UV	Day 7	0.161
1	VIS	Day 0	0.0633333
1	VIS	Day 14	0.153333
1	VIS	Day 7	0.159
2	VIS	Day 0	0.109
2	VIS	Day 14	0.245
2	VIS	Day 7	0.223
3	VIS	Day 0	0.096
3	VIS	Day 14	0.203
3	VIS	Day 7	0.205333
4	VIS	Day 0	0.107
4	VIS	Day 14	0.225
4	VIS	Day 7	0.237333
5	VIS	Day 0	0.214667
5	VIS	Day 14	0.418
5	VIS	Day 7	0.355333
6	VIS	Day 0	0.177333
6	VIS	Day 14	0.264
6	VIS	Day 7	0.31
7	VIS	Day 0	0.128333
7	VIS	Day 14	0.241667
7	VIS	Day 7	0.251333

## Sheet: Texture analysis
Nest	Day	Visual model	EggTexture_1	EggTexture_2	EggTexture_3	EggTexture_4	EggTexture_5	EggTexture_6	EggTexture_7	EggTexture_8	EggTexture_9	EggTexture_10	EggTexture_11	EggTexture_12	EggTexture_13	EggTexture_14	EggTexture_15	EggTexture_16	EggTexture_17	EggTexture_18	EggTexture_19	EggTexture_20	MicrohabitatTexture_1	MicrohabitatTexture_2	MicrohabitatTexture_3	MicrohabitatTexture_4	MicrohabitatTexture_5	MicrohabitatTexture_6	MicrohabitatTexture_7	MicrohabitatTexture_8	MicrohabitatTexture_9	MicrohabitatTexture_10	MicrohabitatTexture_11	MicrohabitatTexture_12	MicrohabitatTexture_13	MicrohabitatTexture_14	MicrohabitatTexture_15	MicrohabitatTexture_16	MicrohabitatTexture_17	MicrohabitatTexture_18	MicrohabitatTexture_19	MicrohabitatTexture_20	Egg_Microhabitat_HistDif
1	Day 0	Blue Tit	0.049	0.039	0	0.01	0.016	0.079	0	0	0.045	0.064	0.005	0	0.184	0.306	0.057	0.097	0.015	0.006	0.002	0.025	0.049	0.063	0.004	0.059	0.083	0.027	0.003	0.004	0.037	0.059	0.071	0.161	0.075	0.131	0.025	0.011	0.031	0.006	0.044	0.057	8.467
2	Day 0	Blue Tit	0.014	0.105	0.091	0.211	0.007	0	0.003	0.09	0.023	0	0.148	0.065	0.09	0.004	0	0	0.061	0.004	0.048	0.038	0.092	0.067	0.039	0.045	0.08	0.008	0.062	0.093	0.071	0.006	0.055	0.014	0.094	0.055	0.006	0.008	0.028	0.111	0.014	0.052	7.378
3	Day 0	Blue Tit	0	0	0.016	0.073	0.005	0.013	0.006	0.061	0.003	0.305	0	0.106	0.049	0.001	0.035	0.029	0.033	0.252	0.003	0.01	0.008	0.035	0.022	0.064	0.045	0.083	0.025	0.041	0.015	0.061	0.05	0.069	0.079	0.095	0.056	0.023	0.06	0.065	0.052	0.053	8.312
4	Day 0	Blue Tit	0	0.012	0.012	0	0	0.096	0.004	0.035	0.16	0.036	0.009	0	0.038	0	0.274	0	0.081	0.141	0.063	0.041	0.005	0.039	0.037	0.097	0.02	0.038	0.029	0.101	0.064	0.041	0.068	0.027	0.076	0.02	0.056	0.03	0.046	0.058	0.061	0.088	7.76
5	Day 0	Blue Tit	0.109	0	0	0.01	0.075	0.012	0	0.024	0	0	0.183	0.006	0.114	0.061	0.011	0.209	0.151	0.035	0	0	0.059	0.044	0.033	0.089	0.085	0.008	0.014	0.086	0.016	0.021	0.07	0.016	0.037	0.098	0.082	0.033	0.082	0.058	0.059	0.01	8.435
6	Day 0	Blue Tit	0.176	0	0.026	0.088	0.052	0.018	0.002	0.033	0.065	0.029	0.093	0	0.06	0.002	0.141	0.082	0	0.064	0.023	0.047	0.021	0.056	0.092	0.038	0.037	0.122	0.005	0.062	0.095	0.055	0.046	0.006	0.067	0.017	0.034	0.038	0.035	0.057	0.056	0.059	5.504
7	Day 0	Blue Tit	0	0.046	0.102	0.001	0.089	0.071	0.016	0	0.06	0	0.101	0.027	0.112	0.039	0	0.08	0.052	0.053	0.149	0	0.005	0.1	0.031	0.08	0.087	0.058	0.021	0.073	0.061	0.073	0.053	0.043	0.046	0.024	0.039	0.029	0.071	0.032	0.062	0.013	5.502
1	Day 14	Blue Tit	0.01	0.078	0	0.109	0.095	0	0.017	0	0	0.01	0.1	0.199	0.02	0.074	0	0.112	0.11	0.055	0.011	0.001	0.033	0.016	0.066	0.02	0.003	0.071	0.047	0.162	0.123	0.067	0.109	0.058	0.05	0.003	0.086	0.006	0.002	0.037	0.005	0.037	8.173
2	Day 14	Blue Tit	0.01	0.003	0	0	0	0	0	0.156	0.374	0.04	0.117	0.066	0	0	0.084	0	0	0	0.079	0.07	0.059	0.077	0.055	0.037	0.125	0.04	0.055	0.048	0.008	0.037	0.004	0.091	0.1	0.034	0.011	0.11	0.014	0.061	0.004	0.03	10.273
3	Day 14	Blue Tit	0.098	0.02	0.012	0.082	0	0.231	0	0.005	0	0.004	0.043	0.041	0.009	0.08	0	0.048	0.065	0.001	0.236	0.025	0.046	0.047	0.036	0.079	0.049	0.044	0.047	0.02	0.073	0.069	0.056	0.036	0.106	0.006	0.014	0.084	0.052	0.041	0.013	0.081	7.47
4	Day 14	Blue Tit	0.1	0.023	0	0.126	0.012	0.043	0	0.009	0.002	0	0.159	0.204	0.049	0.024	0.087	0.001	0.001	0	0	0.159	0.037	0.04	0.034	0.035	0.056	0.048	0.105	0.053	0.079	0.098	0.092	0.011	0.046	0.028	0.007	0.086	0.054	0.025	0.062	0.005	8.177
5	Day 14	Blue Tit	0.168	0.066	0	0	0.531	0.018	0.022	0	0	0	0	0	0.035	0.113	0.013	0	0.034	0	0	0	0.017	0.07	0.019	0.168	0.004	0.042	0.03	0.009	0.069	0.041	0.05	0.08	0.049	0.055	0.027	0.021	0.071	0.026	0.111	0.042	11.741
6	Day 14	Blue Tit	0	0.033	0.232	0.316	0	0	0.04	0.034	0	0.001	0	0	0	0.07	0.059	0	0.004	0	0.211	0	0.089	0.044	0.051	0.006	0.046	0.067	0.056	0.083	0.061	0.094	0.054	0.083	0.043	0.08	0.003	0.035	0.027	0.052	0.004	0.021	10.753
7	Day 14	Blue Tit	0.112	0.013	0.111	0.003	0.081	0	0.003	0.338	0	0	0.03	0	0.005	0.003	0.195	0.053	0	0	0.003	0.051	0.062	0.041	0.074	0.056	0.007	0.078	0.086	0.008	0.043	0.045	0.043	0.049	0.02	0.082	0.045	0.043	0.115	0.054	0.047	0.002	9.587
1	Day 7	Blue Tit	0.006	0.167	0.074	0	0.05	0.009	0.009	0.019	0.09	0.12	0	0	0.157	0.065	0.017	0.092	0.021	0.077	0	0.028	0.036	0.086	0.035	0.069	0.103	0.077	0.065	0.046	0.053	0.003	0.127	0.004	0.003	0.016	0.06	0.006	0.079	0.004	0.047	0.08	7.177
2	Day 7	Blue Tit	0.29	0.016	0	0	0	0	0.102	0.194	0.022	0.002	0	0.022	0.091	0.032	0.184	0.027	0	0.015	0	0.002	0.007	0.009	0.102	0.091	0.056	0.065	0.004	0.013	0.05	0.111	0.054	0.056	0.003	0.063	0.077	0.017	0.065	0.088	0.055	0.015	9.83
3	Day 7	Blue Tit	0.067	0.082	0	0.016	0.141	0	0.213	0.025	0	0.102	0.023	0.003	0	0.222	0	0	0.023	0.068	0.016	0	0.079	0.007	0.052	0.05	0.037	0.038	0.06	0.103	0.115	0.067	0.051	0.033	0.058	0.01	0.036	0.077	0.025	0.047	0.031	0.024	8.161
4	Day 7	Blue Tit	0.169	0.003	0.068	0.006	0.05	0.043	0	0.176	0.162	0.009	0.008	0	0.044	0.016	0	0.138	0	0.097	0.011	0	0.058	0.128	0.06	0.051	0.047	0.036	0.061	0.006	0.068	0.038	0.005	0.034	0.048	0.075	0.066	0.024	0.019	0.004	0.099	0.075	7.926
5	Day 7	Blue Tit	0	0.007	0	0	0	0.014	0.018	0	0	0.233	0.059	0	0.006	0.201	0	0	0.452	0.009	0	0	0.017	0.03	0.068	0.086	0.017	0.081	0.032	0.007	0.057	0.017	0.059	0.052	0.05	0.003	0.097	0.139	0.004	0.057	0.041	0.086	12.75
6	Day 7	Blue Tit	0	0	0.056	0.363	0	0	0	0	0	0.064	0	0	0.01	0	0.021	0	0.291	0.168	0	0.028	0.07	0.026	0.03	0.004	0.048	0.053	0.006	0.143	0.033	0.072	0.084	0.062	0.064	0.094	0.03	0.066	0.009	0.049	0.006	0.049	11.912
7	Day 7	Blue Tit	0	0.012	0.077	0	0.115	0.006	0.011	0	0.04	0.352	0.112	0.098	0.003	0	0.01	0.05	0.013	0	0.071	0.03	0.012	0.039	0.044	0.057	0.007	0.038	0.041	0.048	0.072	0.014	0.059	0.048	0.12	0.07	0.023	0.02	0.051	0.075	0.042	0.12	8.207
1	Day 0	Ferret	0.004	0.016	0.076	0.155	0.023	0.009	0.053	0.007	0.078	0	0.061	0.039	0.312	0	0	0	0.014	0.012	0.05	0.091	0.05	0.087	0.065	0.074	0.042	0.006	0.031	0.041	0.03	0.004	0.077	0.061	0.128	0.003	0.004	0.163	0.057	0.028	0.036	0.011	8.221
2	Day 0	Ferret	0.003	0.047	0.071	0.088	0.062	0.09	0.041	0	0.029	0.005	0.007	0	0.073	0.002	0.091	0.207	0.079	0.095	0.01	0	0.077	0.013	0.018	0.039	0.106	0.047	0.058	0.003	0.083	0.066	0.112	0.006	0.049	0.05	0.081	0.05	0.086	0.04	0.008	0.008	6.603
3	Day 0	Ferret	0.018	0.007	0.078	0.059	0	0.046	0.24	0	0.001	0.009	0.029	0.042	0.041	0.001	0.004	0.056	0.006	0.293	0	0.072	0.037	0.041	0.06	0.059	0.082	0.056	0.058	0.099	0.047	0.058	0.028	0.042	0.034	0.034	0.021	0.093	0.021	0.058	0.008	0.064	7.703
4	Day 0	Ferret	0.016	0.023	0.048	0.028	0.004	0.078	0.109	0.012	0.048	0.041	0.009	0.217	0.192	0	0.002	0	0	0.137	0.036	0	0.101	0.045	0.054	0.043	0.017	0.036	0.061	0.044	0.041	0.055	0.036	0.043	0.053	0.081	0.064	0.052	0.026	0.059	0.085	0.006	6.867
5	Day 0	Ferret	0	0.116	0.001	0.084	0.115	0	0	0.228	0.026	0	0.052	0.001	0.162	0	0.045	0.105	0.006	0.002	0.03	0.026	0.013	0.056	0.077	0.098	0.091	0.03	0.024	0.04	0.038	0.032	0.088	0.101	0.06	0.012	0.074	0.033	0.007	0.008	0.039	0.081	8.041
6	Day 0	Ferret	0	0.053	0.042	0.004	0.026	0.086	0.058	0	0.024	0	0.082	0.176	0.033	0.101	0.033	0.05	0.11	0.05	0.002	0.071	0.007	0.092	0.065	0.005	0.118	0.028	0.028	0.03	0.052	0.056	0.04	0.036	0.07	0.041	0.05	0.088	0.047	0.078	0.019	0.05	5.146
7	Day 0	Ferret	0	0.098	0.096	0.003	0.141	0	0	0.103	0.105	0	0.104	0.086	0	0.018	0.037	0.066	0.036	0.025	0.066	0.015	0.015	0.031	0.089	0.034	0.06	0.083	0.063	0.059	0.044	0.069	0.051	0.058	0.005	0.025	0.044	0.043	0.044	0.113	0.048	0.022	5.709
1	Day 14	Ferret	0.221	0	0.041	0.064	0.01	0.025	0	0.119	0.078	0.175	0.001	0.069	0.002	0	0	0.058	0	0.021	0.114	0.003	0.054	0.063	0.117	0.05	0.006	0.031	0.118	0.005	0.016	0.004	0.036	0.003	0.073	0.076	0.07	0.031	0.145	0.035	0.003	0.063	8.621
2	Day 14	Ferret	0.126	0.183	0	0	0	0	0.049	0.298	0	0.014	0	0.1	0.018	0.064	0.057	0.001	0	0.018	0.071	0.001	0.005	0.003	0.069	0.107	0.054	0.076	0.034	0.007	0.061	0.082	0.018	0.093	0.041	0.003	0.001	0.129	0.042	0.063	0.104	0.009	9.699
3	Day 14	Ferret	0.002	0.043	0.081	0.116	0.002	0	0.047	0.04	0.01	0	0.065	0.057	0.085	0.07	0	0.249	0.112	0	0	0.02	0.036	0.063	0.048	0.05	0.018	0.06	0.079	0.024	0.05	0.032	0.006	0.032	0.08	0.058	0.096	0.015	0.079	0.06	0.046	0.065	6.611
4	Day 14	Ferret	0.003	0.093	0.009	0.347	0.067	0.098	0.011	0	0.017	0.008	0.068	0.038	0	0.21	0.019	0.011	0	0	0	0	0.065	0.094	0.044	0.063	0.007	0.07	0.094	0.036	0.047	0.071	0.044	0.048	0.1	0.007	0.037	0.052	0.01	0.061	0.033	0.017	9.104
5	Day 14	Ferret	0.098	0	0.347	0	0	0	0.091	0	0	0.003	0	0	0	0.136	0	0	0.011	0.003	0.288	0.023	0.078	0.169	0.001	0.058	0.036	0.033	0.023	0.021	0.024	0.038	0.071	0.016	0.095	0.046	0.009	0.049	0.083	0.042	0.005	0.105	12.122
6	Day 14	Ferret	0.022	0	0	0.079	0.024	0	0	0	0.006	0.251	0	0	0	0.031	0.045	0.211	0	0	0.322	0.009	0.09	0.08	0.043	0.052	0.079	0.043	0.087	0.018	0.028	0.005	0.054	0.058	0.037	0.064	0.056	0.054	0.019	0.052	0.03	0.051	10.665
7	Day 14	Ferret	0.007	0.002	0.027	0.02	0.091	0	0.131	0.018	0.032	0	0	0.001	0.033	0	0.043	0	0.007	0.172	0.143	0.274	0.045	0.051	0.046	0.059	0.081	0.006	0.044	0.06	0.096	0.079	0.038	0.074	0.064	0.126	0.002	0.048	0.023	0.002	0.002	0.055	8.896
1	Day 7	Ferret	0.116	0.012	0.015	0.085	0.024	0.045	0.076	0.072	0.006	0.193	0.002	0.107	0.017	0	0.04	0.041	0	0	0.075	0.073	0.003	0.061	0.035	0.005	0.079	0.102	0.025	0.004	0.061	0.078	0.064	0.006	0.082	0.047	0.045	0.044	0.128	0.069	0.004	0.056	6.452
2	Day 7	Ferret	0.164	0	0.003	0.04	0	0	0.077	0.093	0	0.103	0.001	0	0.007	0.032	0.044	0.086	0.031	0.003	0.001	0.315	0.05	0.087	0.064	0.085	0.062	0.008	0.042	0.003	0.059	0.003	0.101	0.111	0.104	0.046	0.053	0.003	0.049	0.044	0.016	0.01	9.093
3	Day 7	Ferret	0.001	0	0	0	0.019	0.087	0.032	0.115	0.106	0.142	0.018	0	0.017	0	0.061	0	0	0	0.21	0.192	0.027	0.042	0.029	0.125	0.046	0.089	0.038	0.002	0.043	0.074	0.043	0.072	0.006	0.049	0.103	0.037	0.012	0.074	0.027	0.062	8.773
4	Day 7	Ferret	0.206	0.001	0.017	0.001	0.006	0.013	0.002	0.199	0.102	0.003	0	0.013	0.086	0.107	0	0.016	0.112	0.069	0.011	0.036	0.006	0.117	0.048	0.023	0.085	0.041	0.036	0.005	0.042	0.064	0.061	0.035	0.005	0.081	0.066	0.003	0.054	0.051	0.097	0.08	8.032
5	Day 7	Ferret	0	0.069	0	0	0	0.202	0.169	0	0.16	0.011	0	0	0	0.006	0	0.01	0	0.017	0.357	0	0.05	0.057	0.103	0.008	0.042	0.002	0.012	0.018	0.001	0.075	0.046	0.018	0.057	0.032	0.091	0.1	0.142	0.076	0.004	0.066	11.961
6	Day 7	Ferret	0	0	0	0.018	0.021	0	0	0.04	0.024	0.013	0.376	0.148	0	0	0.279	0	0	0	0	0.08	0.052	0.007	0.037	0.03	0.045	0.139	0.086	0.034	0.06	0.077	0.005	0.045	0.021	0.048	0.015	0.008	0.061	0.07	0.089	0.073	11.474
7	Day 7	Ferret	0.008	0	0.049	0.002	0.032	0.315	0.137	0	0.072	0.094	0.008	0.076	0.077	0.069	0.018	0	0	0.035	0	0.009	0.021	0.063	0.07	0.039	0.042	0.011	0.056	0.022	0.007	0.061	0.051	0.002	0.041	0.054	0.048	0.116	0.051	0.031	0.077	0.136	7.867
1	Day 0	Human	0.072	0.108	0.014	0.046	0	0.01	0.093	0.022	0.018	0.049	0.034	0.027	0.058	0.013	0	0.011	0	0	0.342	0.083	0.029	0.098	0.064	0.062	0.158	0.039	0.068	0.088	0.067	0.05	0.035	0.027	0.036	0.042	0.004	0.006	0.003	0.004	0.113	0.009	7.894
2	Day 0	Human	0.143	0	0.01	0.099	0.056	0.029	0.009	0.001	0.008	0.038	0	0.105	0.003	0.205	0.075	0.016	0.005	0.048	0.078	0.072	0.034	0.007	0.131	0.039	0.103	0.081	0.065	0.002	0.074	0.059	0.002	0.039	0.055	0.054	0.019	0.082	0.012	0.012	0.05	0.08	6.983
3	Day 0	Human	0.078	0.007	0	0.001	0	0.018	0	0.002	0.064	0.041	0.002	0.018	0.019	0.003	0.035	0.031	0.111	0.277	0.242	0.049	0.046	0.02	0.084	0.012	0.05	0.031	0.008	0.036	0.04	0.053	0.098	0.086	0.027	0.045	0.046	0.095	0.059	0.052	0.058	0.055	7.9
4	Day 0	Human	0.004	0	0.01	0.017	0.06	0.075	0.002	0.028	0.024	0	0.04	0.006	0.258	0.021	0.149	0.034	0.024	0.111	0.138	0	0.089	0.006	0.035	0.042	0.065	0.028	0.082	0.047	0.05	0.043	0.047	0.018	0.05	0.036	0.051	0.053	0.106	0.068	0.058	0.026	6.781
5	Day 0	Human	0.132	0.007	0	0	0.111	0	0.214	0.006	0.031	0.085	0.009	0.097	0.002	0	0	0	0.024	0.052	0.033	0.196	0.097	0.066	0.023	0.086	0.034	0.033	0.039	0.007	0.075	0.092	0.097	0.057	0.014	0.011	0.053	0.011	0.034	0.085	0.041	0.046	8.263
6	Day 0	Human	0.033	0.001	0.03	0.005	0	0.096	0.029	0.041	0.022	0.12	0.063	0.043	0	0.079	0.059	0.091	0	0.039	0.073	0.178	0.051	0.018	0.06	0.005	0.054	0.042	0.052	0.117	0.055	0.03	0.063	0.119	0.006	0.044	0.03	0.051	0.029	0.085	0.035	0.053	5.267
7	Day 0	Human	0.044	0.004	0.048	0	0	0	0.096	0.015	0.014	0	0.122	0.063	0.014	0.076	0.103	0.107	0.088	0	0.083	0.124	0.113	0.042	0.033	0.09	0.062	0.016	0.041	0.023	0.022	0.074	0.056	0.05	0.044	0.058	0.053	0.086	0.029	0.005	0.047	0.055	5.794
1	Day 14	Human	0.107	0.007	0	0	0.034	0.058	0.118	0.073	0.026	0	0.075	0.001	0	0.071	0.041	0.001	0.144	0.069	0.173	0	0.023	0.04	0.076	0.074	0.058	0.046	0.005	0.021	0.006	0.118	0.073	0.061	0.066	0.003	0.109	0.039	0.004	0.004	0.052	0.124	7.569
2	Day 14	Human	0.049	0.207	0	0	0.077	0.004	0.001	0.011	0	0.026	0.009	0.002	0	0.318	0	0	0.135	0	0.003	0.161	0.037	0.003	0.009	0.037	0.003	0.086	0.145	0.069	0.024	0.063	0.075	0.049	0.073	0.007	0.082	0.041	0.104	0.053	0.035	0.004	10.877
3	Day 14	Human	0.093	0.036	0.018	0.23	0.092	0.019	0.004	0.072	0.039	0.259	0.009	0.029	0	0.019	0.027	0.047	0	0.007	0	0	0.071	0.006	0.061	0.056	0.057	0.05	0.042	0.084	0.037	0.011	0.038	0.09	0.015	0.103	0.044	0.041	0.063	0.02	0.067	0.045	7.261
4	Day 14	Human	0.005	0.063	0	0.008	0.358	0.008	0.003	0.13	0.052	0	0.229	0.016	0.013	0	0.015	0.043	0	0.04	0	0.016	0.071	0.047	0.012	0.043	0.064	0.049	0.073	0.004	0.095	0.037	0.007	0.037	0.083	0.101	0.045	0.074	0.064	0.007	0.032	0.053	9.334
5	Day 14	Human	0	0.432	0.023	0	0	0	0.007	0	0	0	0.096	0.253	0	0	0	0.032	0	0.075	0.081	0	0.11	0.004	0.028	0.162	0.043	0.094	0.025	0.03	0.033	0.01	0.08	0.02	0.024	0.016	0.035	0.062	0.064	0.058	0.066	0.035	11.918
6	Day 14	Human	0.01	0.204	0	0.055	0	0.001	0	0	0	0.006	0.002	0.103	0.069	0.34	0.028	0	0.082	0	0.1	0	0.041	0.005	0.088	0.09	0.025	0.052	0.064	0.069	0.035	0.047	0.068	0.041	0.046	0.031	0.044	0.056	0.062	0.057	0.067	0.012	9.601
7	Day 14	Human	0.094	0	0	0.127	0.323	0.017	0.001	0.082	0	0.015	0.007	0.036	0.045	0	0	0.199	0.007	0	0.002	0.045	0.051	0.062	0.053	0.042	0.005	0.081	0.031	0.085	0.075	0.045	0.042	0.061	0.046	0.077	0.072	0.06	0.023	0.024	0.007	0.058	8.953
1	Day 7	Human	0	0.176	0.033	0.019	0.026	0.001	0.043	0.033	0.102	0.002	0	0.138	0.136	0.012	0.075	0.05	0.004	0.005	0.067	0.077	0.069	0.074	0.038	0.066	0.079	0.037	0.099	0.074	0.031	0.003	0.126	0.008	0.001	0.045	0.004	0.055	0.067	0.06	0.028	0.036	6.586
2	Day 7	Human	0.033	0.188	0.076	0.243	0.033	0.003	0.011	0	0	0.236	0.078	0.005	0.006	0.041	0	0	0.003	0.04	0.003	0	0.051	0.072	0.003	0.019	0.05	0.054	0.11	0.008	0.064	0.003	0.002	0.048	0.11	0.06	0.047	0.072	0.019	0.043	0.073	0.09	9.355
3	Day 7	Human	0	0.139	0.03	0	0	0	0.008	0.016	0.022	0.101	0.044	0.001	0.106	0	0	0.017	0.194	0.077	0.246	0	0.039	0.067	0.035	0.071	0.023	0.121	0.032	0.007	0.042	0.045	0.105	0.032	0.055	0.026	0.044	0.043	0.059	0.085	0.005	0.065	8.583
4	Day 7	Human	0.009	0.231	0.002	0	0.172	0.051	0.148	0	0.102	0.004	0.011	0	0.003	0.039	0.033	0.009	0.035	0.001	0.005	0.144	0.031	0.006	0.129	0.067	0.05	0.005	0.079	0.013	0.058	0.031	0.038	0.057	0.032	0.087	0.04	0.079	0.039	0.064	0.057	0.037	8.272
5	Day 7	Human	0.006	0.125	0.335	0	0	0	0.007	0.333	0	0.071	0.011	0.049	0	0.002	0.06	0	0	0	0	0	0.102	0.047	0.012	0.047	0.055	0.084	0.029	0.005	0.03	0.074	0.036	0.049	0.018	0.076	0.074	0.038	0.017	0.007	0.139	0.062	11.636
6	Day 7	Human	0	0	0.003	0	0.06	0	0	0.12	0.037	0	0	0	0.319	0.02	0	0.075	0	0.059	0	0.308	0.007	0.052	0.018	0.071	0.063	0.05	0.027	0.044	0.055	0.085	0.143	0.014	0.004	0.077	0.063	0.048	0.032	0.051	0.084	0.012	11.041
7	Day 7	Human	0	0	0.002	0.035	0.062	0.024	0.001	0	0	0.009	0.093	0.15	0.065	0.067	0.088	0	0.018	0.011	0.372	0	0.039	0.019	0.135	0.04	0.08	0.007	0.038	0.048	0.075	0.022	0.047	0.05	0.038	0.041	0.057	0.11	0.033	0.048	0.013	0.063	8.758
1	Day 0	Peafowl	0.043	0	0.02	0.026	0.013	0.317	0.006	0	0.014	0.009	0.05	0.073	0	0.079	0.006	0.16	0.049	0.091	0.045	0	0.061	0.004	0.084	0.042	0.029	0.13	0.049	0.162	0.057	0.042	0.031	0.029	0.003	0.067	0.006	0.073	0.036	0.011	0.079	0.004	8.212
2	Day 0	Peafowl	0.055	0	0.072	0.062	0.008	0.116	0.045	0.06	0.036	0.108	0.074	0	0	0	0.152	0.005	0.002	0.184	0.006	0.015	0.033	0.006	0.04	0.074	0.099	0.05	0.014	0.072	0.091	0.054	0.016	0.008	0.008	0.003	0.045	0.065	0.043	0.078	0.108	0.094	7.114
3	Day 0	Peafowl	0.005	0.001	0.005	0.001	0.326	0.004	0.012	0.045	0.005	0.014	0.055	0	0.003	0.048	0.163	0.04	0.055	0.042	0.118	0.06	0.083	0.043	0.066	0.078	0.06	0.022	0.055	0.03	0.025	0.03	0.086	0.008	0.036	0.034	0.045	0.048	0.047	0.086	0.062	0.055	7.344
4	Day 0	Peafowl	0.003	0.041	0.076	0	0.029	0.068	0.225	0.012	0	0.076	0.024	0	0.047	0	0.022	0	0.173	0.17	0.034	0	0.056	0.064	0.048	0.037	0.043	0.047	0.048	0.04	0.021	0.034	0.039	0.059	0.112	0.014	0.099	0.026	0.065	0.052	0.092	0.005	7.317
5	Day 0	Peafowl	0.005	0.048	0	0.068	0.147	0	0.086	0.157	0	0	0.046	0.027	0.135	0	0.003	0	0.182	0.09	0	0.006	0.059	0.09	0.078	0.057	0.023	0.014	0.097	0.058	0.036	0.018	0.058	0.091	0.038	0.033	0.09	0.011	0.044	0.087	0.01	0.007	8.155
6	Day 0	Peafowl	0.003	0.073	0.081	0.044	0.068	0.023	0.168	0.044	0	0.044	0	0.06	0.111	0.06	0.011	0.08	0	0.055	0.014	0.061	0.019	0.036	0.046	0.054	0.035	0.052	0.029	0.075	0.006	0.051	0.005	0.081	0.031	0.094	0.117	0.041	0.05	0.036	0.068	0.074	4.815
7	Day 0	Peafowl	0.017	0.052	0	0.023	0.117	0.167	0	0.084	0.06	0.082	0	0.039	0.111	0.094	0.077	0	0	0.068	0	0.008	0.024	0.036	0.005	0.02	0.044	0.073	0.014	0.042	0.114	0.092	0.064	0.045	0.057	0.031	0.051	0.071	0.039	0.043	0.088	0.047	6.068
1	Day 14	Peafowl	0.064	0.005	0.035	0	0.058	0.206	0.079	0	0.143	0.013	0.043	0.096	0	0.075	0	0	0.019	0.079	0	0.085	0.016	0.04	0.061	0.04	0.044	0.058	0.005	0.126	0.002	0.068	0.032	0.003	0.064	0.004	0.083	0.161	0.005	0.003	0.073	0.114	8.085
2	Day 14	Peafowl	0	0.061	0.003	0	0.1	0.003	0	0	0.065	0.121	0	0	0.274	0	0.011	0.009	0.198	0.032	0	0.123	0.062	0.064	0.073	0.144	0.004	0.071	0.068	0.009	0.003	0.104	0.127	0.015	0.008	0.037	0.044	0.051	0.003	0.038	0.072	0.001	10.202
3	Day 14	Peafowl	0	0.221	0.088	0.046	0.013	0.003	0.075	0.036	0.014	0.045	0	0.006	0.227	0.08	0	0.013	0	0.02	0.083	0.031	0.053	0.055	0.006	0.012	0.11	0.041	0.077	0.097	0.053	0.053	0.071	0.02	0.014	0.085	0.014	0.038	0.065	0.041	0.059	0.037	7.154
4	Day 14	Peafowl	0.092	0.05	0.012	0.183	0	0.02	0	0.013	0.002	0.056	0.108	0	0.133	0.004	0.038	0.002	0.262	0.016	0.003	0.004	0.007	0.028	0.056	0.008	0.104	0.068	0.064	0.051	0.048	0.038	0.036	0.013	0.072	0.038	0.087	0.097	0.05	0.045	0.004	0.084	8.262
5	Day 14	Peafowl	0.005	0	0	0	0	0	0	0.025	0.079	0	0	0.047	0	0	0.501	0	0	0.005	0.147	0.19	0.042	0.047	0.031	0.066	0.037	0.03	0.02	0.104	0.048	0.009	0.045	0.058	0.08	0.021	0.005	0.165	0.059	0.087	0.028	0.018	12.524
6	Day 14	Peafowl	0.297	0	0	0.018	0.003	0.006	0.087	0.002	0.092	0	0	0	0	0	0.245	0.086	0.022	0	0.142	0	0.014	0.09	0.039	0.062	0.083	0.025	0.048	0.058	0.003	0.082	0.044	0.07	0.062	0.017	0.005	0.078	0.046	0.059	0.057	0.057	10.368
7	Day 14	Peafowl	0	0.095	0	0.256	0.004	0.003	0	0.101	0.013	0.009	0.009	0.023	0.249	0.004	0	0.204	0.019	0.001	0.009	0	0.077	0.049	0.075	0.029	0.079	0.047	0.039	0.066	0.034	0.034	0.047	0.059	0.052	0.049	0.081	0.002	0.054	0.094	0.027	0.006	9.979
1	Day 7	Peafowl	0	0.099	0.024	0.013	0.079	0.074	0.03	0.096	0.001	0.021	0.193	0.018	0.021	0.072	0.04	0.105	0.096	0	0.018	0	0.054	0.006	0.076	0.05	0.004	0.018	0.04	0.005	0.043	0.115	0.083	0.069	0.082	0.004	0.055	0.003	0.05	0.066	0.05	0.127	6.516
2	Day 7	Peafowl	0.035	0	0	0.001	0	0.092	0.001	0.027	0.286	0	0	0.089	0.008	0.026	0.103	0	0.18	0.035	0.001	0.114	0.036	0.054	0.016	0.127	0.068	0.003	0.055	0.087	0.008	0.072	0.069	0.003	0.098	0.048	0.039	0.008	0.08	0.058	0.069	0.003	9.319
3	Day 7	Peafowl	0.006	0.092	0.09	0	0.221	0.039	0.037	0	0.087	0	0.019	0.032	0.079	0.209	0.001	0	0	0.018	0	0.069	0.033	0.04	0.007	0.075	0.061	0.104	0.015	0.059	0.079	0.025	0.047	0.027	0.085	0.01	0.037	0.041	0.118	0.034	0.051	0.05	7.63
4	Day 7	Peafowl	0.193	0.042	0.046	0.007	0	0.091	0.003	0	0.174	0.005	0.003	0.135	0.006	0.112	0.01	0.15	0.005	0	0.006	0.012	0.004	0.045	0.072	0.068	0.063	0.057	0.034	0.021	0.006	0.041	0.097	0.031	0.048	0.005	0.089	0.06	0.127	0.07	0.02	0.041	8.402
5	Day 7	Peafowl	0	0.006	0	0	0	0	0	0.189	0.023	0	0.07	0.002	0.009	0.018	0.246	0	0	0.436	0	0	0.083	0.067	0.041	0.052	0.057	0.077	0.02	0.002	0.049	0.108	0.051	0.038	0.029	0.076	0.013	0.066	0.017	0.005	0.141	0.008	12.684
6	Day 7	Peafowl	0.067	0	0.025	0	0	0	0.093	0	0	0	0.163	0.005	0	0	0.384	0	0.054	0.204	0.006	0	0.045	0.053	0.066	0.019	0.148	0.059	0.002	0.02	0.098	0.068	0.053	0.035	0.008	0.086	0.004	0.03	0.052	0.014	0.072	0.068	11.423
7	Day 7	Peafowl	0.032	0.016	0.066	0.144	0.026	0	0.015	0.068	0.005	0	0.011	0.001	0	0.303	0	0.07	0.059	0	0.072	0.113	0.019	0.042	0.045	0.058	0.031	0.048	0.049	0.101	0.041	0.024	0.021	0.123	0.059	0.02	0.093	0.082	0.059	0.077	0.002	0.007	7.887
